# Supplementary material
Source: PubMed Central journal article supplement (PMC2951064)
Supplement: jm100555f_si_001.pdf [file jm100555f_si_001.pdf]

## ***Supporting Information***

### **Expanding the Diversity of Allosteric Bcr-Abl Inhibitors**

*Xianming Deng<sup>1,2,7</sup>, Barun Okram<sup>3,7</sup>, Qiang Ding<sup>4,7</sup>, Jianming Zhang<sup>1,2,7</sup>, Yongmun Choi<sup>1,2</sup>, Francisco J. Adrián<sup>4</sup>, Amy Wojciechowski<sup>1,2</sup>, Guobao Zhang<sup>4</sup>, Jianwei Che<sup>4</sup>, Badry Bursulaya<sup>4</sup>, Sandra W. Cowan-Jacob<sup>5</sup>, Gabriele Rummel<sup>5</sup>, Taebo Sim<sup>6,\*</sup> and Nathanael S. Gray<sup>1,2,\*</sup>*

*1. Department of Biological Chemistry & Molecular Pharmacology, Harvard Medical School. 2. Department of Cancer Biology, Dana-Farber Cancer Institute, 250 Longwood Ave, SGM 628, Boston, Ma 02115. 3. Department of Chemistry, The Scripps Research Institute, 10550 N. Torrey Pines Road La Jolla, CA 92037. 4. Department of Biological Chemistry, Genomics Institute of the Novartis Research Foundation, 10675 John Jay Hopkins Drive, San Diego CA 92121. 5. Novartis Institutes for Biomedical Research, 4002 Basel, Switzerland. 6. Life/Health Division, Korea Institute of Science and Technology, 39-1 Hawolgok-Dong, Wolsong-Gil5, Seongbuk-Gu, Seoul, 136-791, Korea. 7. Authors contributed equally to this work.*

*\*Corresponding author: Nathanael S. Gray, nathanael\_gray@dfci.harvard.edu Tel: 1-617-582-8590, FAX: 1-617-582-8615. Taebo Sim, tbsim@kist.re.kr, Tel: 82-2-958-6437, Fax: 82-2-958-5189.*

## Contents

1. General chemistry.
2. Spectral data of **4a**, **4c-4e**, **5a-5k**, **6a-6f**, **7a-7d**, **8a-8g**, **9a-9l**, **12**, **14b-14g**, **16b-16d**, **20b**, **21b-21f**, **21h-21l** and **22**.
3. HPLC purity determination.
4. Pharmacokinetic parameters of compounds **5g**, **6a**, **14d** and **21b-I** (Table S1).
5. Calculations of relative transformed energy from *trans* to *cis* (Table S2).
6. Fluorescence polarization assay results of additional compounds (**5g**, **7a**, **12**, **21a-I**) (Table S3).

**1. Chemistry.** Unless otherwise noted, reagents and solvents were obtained from commercial suppliers and were used without further purification.  $^1\text{H}$  NMR spectra were recorded on 400 MHz (Bruker XWIN-NMR) or 600 MHz (Varian AS600), and chemical shifts are reported in parts per million (ppm,  $\delta$ ) downfield from tetramethylsilane (TMS). Coupling constants ( $J$ ) are reported in Hz. Spin multiplicities are described as s (singlet), brs (broad singlet), t (triplet), q (quartet), and m (multiplet). Mass spectra were obtained on a Waters Micromass ZQ instrument. Preparative HPLC was performed on a Waters Symmetry C18 column (19 x 50 mm, 5 $\mu\text{M}$ ) using a gradient of 5-95% acetonitrile in water containing 0.05% trifluoroacetic acid (TFA) over 8 min (10 min run time) at a flow rate of 30 mL/min.

**2. Spectral data of 4a, 4c-4e, 5a-5k, 6a-6f, 7a-7d, 8a-8g, 9a-9l, 12, 14b-14g, 16b-16d, 20b, 21b-21f, 21h-21l and 22.**

**Table 1.**

Compounds **4a** and **4c-4f** were prepared using similar synthetic procedure of **4b**.

***N*<sup>4</sup>-(2-morpholinoethyl)-*N*<sup>6</sup>-(4-(trifluoromethoxy)phenyl)pyrimidine-4,6-diamine**

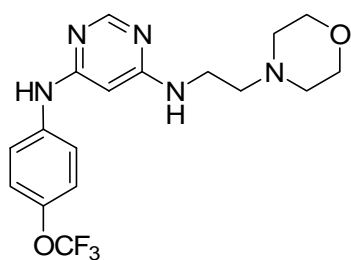

$^1\text{H}$  NMR (400 MHz,  $\text{CDCl}_3$ )  $\delta$  8.21 (s, 1H), 7.76 (s, 1H), 7.34 (d,  $J = 8.2$  Hz, 2H), 7.20 (d,  $J = 8.4$  Hz, 2H), 5.89 (s, 1H), 3.69 (t,  $J = 4.7$  Hz, 4H), 2.27 (d,  $J = 4.3$  Hz, 2H), 2.58 (t,  $J = 5.2$  Hz, 2H), 2.45 (t,  $J = 5.3$  Hz, 4H). MS (ESI)  $m/z$  384 (M+1)

**6-morpholino-N-(4-(trifluoromethoxy)phenyl)pyrimidin-4-amine**

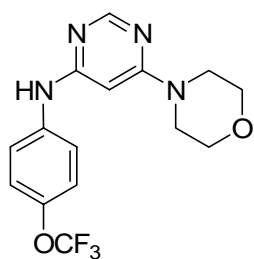

**4c**, TFA salt

$^1\text{H}$  NMR (600 MHz,  $\text{CD}_3\text{OD}$ )  $\delta$  8.24 (s, 1H), 7.48 (d,  $J = 6.6$  Hz, 2H), 7.37 (d,  $J = 7.8$  Hz, 2H), 5.99 (s, 1H), 3.75 (t,  $J = 4.8$  Hz, 4 H), 3.69 (t,  $J = 4.8$  Hz, 4H). MS (ESI)  $m/z$  341 ( $\text{M}+\text{H}$ ) $^+$ .

**6-(1H-imidazol-1-yl)-N-(4-(trifluoromethoxy)phenyl)pyrimidin-4-amine**

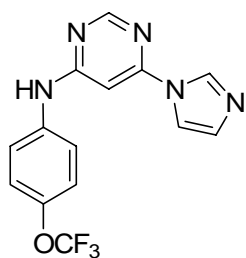

**4d**

$^1\text{H}$  NMR (400 MHz,  $\text{DMSO}-d_6$ )  $\delta$  9.15 (s, 1H), 8.67 (s, 1H), 8.12 (s, 1H), 7.77 (d,  $J = 7.2$  Hz, 2H), 7.51 (s, 1H), 7.40 (d,  $J = 8.2$  Hz, 2H), 7.05 (s, 1H). MS (ESI)  $m/z$  322 ( $\text{M}+\text{H}$ ) $^+$ .

**3-(6-(4-(trifluoromethoxy)phenylamino)pyrimidin-4-yloxy)benzamide**

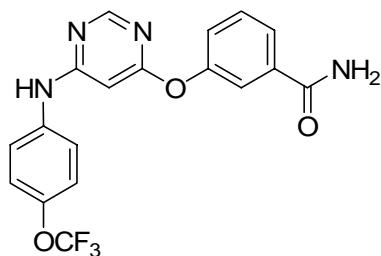

**4e**, TFA salt

$^1\text{H}$  NMR (600 MHz,  $\text{CD}_3\text{OD}$ )  $\delta$  8.32 (d,  $J = 0.6$  Hz, 1H), 7.80 (ddd,  $J = 0.6, 1.2, 8.4$  Hz, 1H), 7.69 (t,  $J = 1.8$  Hz, 1H), 7.66 (d,  $J = 9.0$  Hz, 2H), 7.56 (t,  $J = 8.4$  Hz, 1H), 7.36 (ddd,  $J = 0.6, 2.4, 10.8$  Hz, 1H), 7.22 (d,  $J = 9.0$  Hz, 2H), 6.11 (d,  $J = 0.6$  Hz, 1H). MS (ESI)  $m/z$  391 ( $\text{M}+\text{H}$ ) $^+$ .

**3-(6-(4-(trifluoromethoxy)phenylamino)pyrimidin-4-ylamino)benzamide**

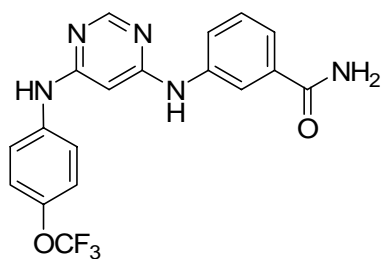

**4f**, TFA salt

$^1\text{H}$  NMR (600 MHz,  $\text{CD}_3\text{OD}$ )  $\delta$  8.31 (s, 1H), 7.93 (t,  $J = 1.2$  Hz, 1H), 7.72 (d,  $J = 7.8$  Hz, 1H), 7.57 (dd,  $J = 1.2, 7.8$  Hz, 1H), 7.54-7.51 (m, 3H), 7.32 (d,  $J = 9.0$  Hz, 2H), 6.14 (s, 1H). MS (ESI)  $m/z$  390 ( $\text{M}+\text{H}$ ) $^+$ , HRMS (ESI) calcd for  $\text{C}_{18}\text{H}_{14}\text{F}_3\text{N}_5\text{O}_2$  389.1100, found 390.1178 ( $\text{M}+\text{H}$ ) $^+$ .

Compounds **5a-5h** were prepared using similar synthetic procedure of **1**<sup>1</sup>.

**4-(6-(4-(trifluoromethoxy)phenylamino)pyrimidin-4-yl)benzamide**

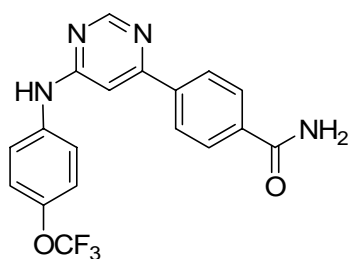

**5a**, TFA salt

$^1\text{H}$  NMR (600 MHz,  $\text{CD}_3\text{OD}$ )  $\delta$  8.81 (d,  $J = 1.2$  Hz, 1H), 8.08 (d,  $J = 9.0$  Hz, 2H), 7.99 (d,  $J = 9.0$  Hz, 2H), 7.80 (d,  $J = 9.0$  Hz, 2H), 7.34 (d,  $J = 8.4$  Hz, 2H), 7.24 (d,  $J = 0.6$  Hz, 1H). MS (ESI)  $m/z$  375 ( $\text{M}+\text{H}$ ) $^+$ .

**2-(6-(4-(trifluoromethoxy)phenylamino)pyrimidin-4-yl)benzamide**

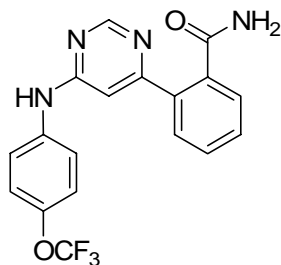

**5b**, TFA salt

<sup>1</sup> Adrian, F. J.; Ding, Q.; Sim, T.; Velentza, A.; Sloan, C.; Liu, Y.; Zhang, G.; Hur, W.; Ding, S.; Manley, P.; Mestan, J.; Fabbro, D.; Gray, N. S. Allosteric inhibitors of Bcr-abl-dependent cell proliferation. *Nat. Chem. Biol.* **2006**, 2, 95-102.

$^1\text{H}$  NMR (600 MHz,  $\text{CD}_3\text{OD}$ )  $\delta$  8.79 (s, 1H), 8.21 (dd,  $J = 1.2, 7.8$  Hz, 1H), 7.80-7.77 (m, 3H), 7.74 (dt,  $J = 1.2, 7.8$  Hz, 1H), 7.59 (dd,  $J = 1.2, 7.2$  Hz, 1H), 7.36 (d,  $J = 8.4$  Hz, 2H), 6.93 (s, 1H). MS (ESI)  $m/z$  375 ( $\text{M}+\text{H}$ ) $^+$ .

**6-(pyridin-4-yl)-N-(4-(trifluoromethoxy)phenyl)pyrimidin-4-amine**

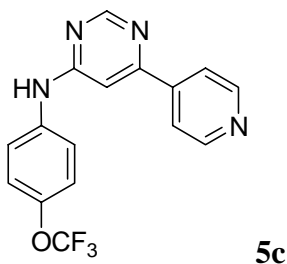

$^1\text{H}$  NMR (400 MHz,  $\text{CDCl}_3$ ),  $\delta$  8.83 (s, 1H), 8.79 (d,  $J = 8.2$  Hz, 2H), 7.82 (d,  $J = 9.0$  Hz, 2H), 7.51 (d,  $J = 8.4$  Hz, 2H), 7.29 (d,  $J = 8.4$  Hz, 2H), 7.09 (s, 1H). MS (ESI)  $m/z$  333 ( $\text{M}+\text{H}$ ) $^+$ .

**3-(6-(4-(trifluoromethoxy)phenylamino)pyrimidin-4-yl)benzenesulfonamide**

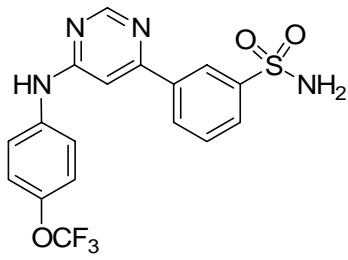

$^1\text{H}$  NMR (400 MHz,  $\text{DMSO}-d_6$ )  $\delta$  8.79 (s, 1H), 8.53 (s, 1H), 8.23 (d,  $J = 8.5$  Hz, 1H), 7.96 (d,  $J = 5.1$  Hz, 1H), 7.85 (d,  $J = 6.9$  Hz, 2H), 7.75 (t,  $J = 7.9$  Hz, 1H), 7.48 (s, 2H), 7.36 (d,  $J = 8.2$  Hz, 2H), 7.33 (s, 1H). MS (ESI)  $m/z$  411 ( $\text{M}+\text{H}$ ) $^+$ .

**6-(3-(methylsulfonyl)phenyl)-N-(4-(trifluoromethoxy)phenyl)pyrimidin-4-amine**

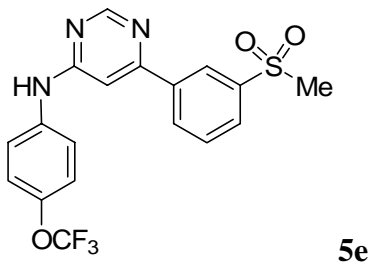

$^1\text{H}$  NMR (400 MHz,  $\text{CDCl}_3$ )  $\delta$  8.81 (s, 1H), 8.55-8.54 (m, 1H), 8.30-8.28 (m, 1H), 8.10-8.03 (m, 1H), 7.71-7.68 (m, 1H), 7.55-7.53 (m, 2H), 7.28-7.27 (m, 1H), 7.10-7.09 (m, 2H), 3.11 (s, 3H). MS (ESI)  $m/z$  410 ( $\text{M}+\text{H}$ ) $^+$ .

**6-(3-aminophenyl)-N-(4-(trifluoromethoxy)phenyl)pyrimidin-4-amine**

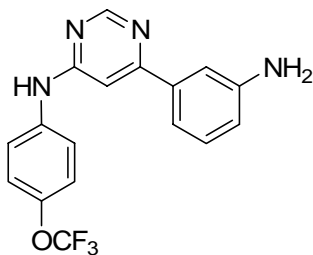

**5f**, TFA salt

$^1\text{H}$  NMR (600 MHz,  $\text{CD}_3\text{OD}$ )  $\delta$  8.80 (s, 1H), 7.80 (d,  $J = 9.0$  Hz, 2H), 7.50 (t,  $J = 8.4$  Hz, 1H), 7.46-7.42 (m, 2H), 7.36 (d,  $J = 8.4$  Hz, 2H), 7.24 (d,  $J = 7.8$  Hz, 1H), 7.20 (s, 1H). MS (ESI)  $m/z$  347 ( $\text{M}+\text{H}$ ) $^+$ .

**4-(6-(4-(trifluoromethoxy)phenylamino)pyrimidin-4-yl)benzenesulfonamide**

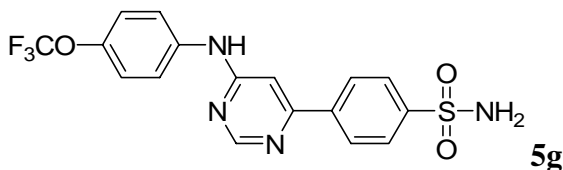

**5g**

$^1\text{H}$  NMR (600 MHz,  $\text{DMSO}-d_6$ )  $\delta$  9.97 (brs, 1H), 8.76 (s, 1H), 8.18 (d,  $J = 7.8$  Hz, 2H), 7.96 (d,  $J = 8.4$  Hz, 2H), 7.83 (d,  $J = 9.0$  Hz, 2H), 7.44 (brs, 2H), 7.34 (d,  $J = 8.4$  Hz, 2H), 7.31 (s, 1H). MS (ESI)  $m/z$  411 ( $\text{M} + \text{H}$ ) $^+$ .

**N-(4-(6-(4-(trifluoromethoxy)phenylamino)pyrimidin-4-yl)phenyl)methanesulfonamide**

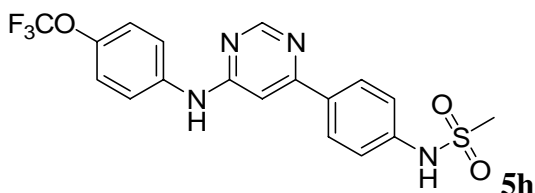

**5h**

$^1\text{H}$  NMR (400 MHz,  $\text{DMSO}-d_6$ )  $\delta$  10.09 (s, 1H), 8.80 (s, 1H), 8.24 (d,  $J = 8.8$  Hz, 2H), 7.94 (d,  $J = 8.8$  Hz, 2H), 7.85 (d,  $J = 9.2$  Hz, 2H), 7.38 (d,  $J = 8.4$  Hz, 2H), 7.33 (d,  $J = 0.8$  Hz, 1H), 2.47 (d,  $J = 4.8$  Hz, 3H). MS (ESI)  $m/z$  425 ( $\text{M} + \text{H}$ ) $^+$ .

Compounds **5i-5k** were prepared using similar synthetic procedure of **2**.

**N-(2-morpholinoethyl)-3-(6-(4-(trifluoromethoxy)phenylamino)pyrimidin-4-yl)benzamide**

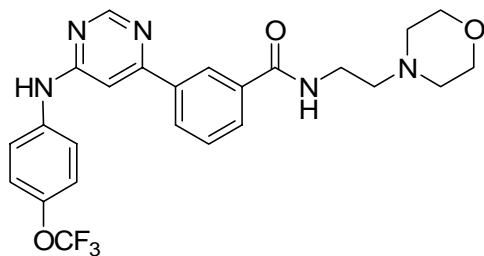

$^1\text{H}$  NMR (600 MHz,  $\text{CD}_3\text{OD}$ )  $\delta$  8.69 (d,  $J = 1.2$  Hz, 1H), 8.45 (t,  $J = 1.8$  Hz, 1H), 8.13 (ddd,  $J = 1.2, 1.8, 7.8$  Hz, 1H), 7.94 (ddd,  $J = 1.2, 1.8, 7.8$  Hz, 1H), 7.79 (d,  $J = 9.0$  Hz, 2H), 7.61 (t,  $J = 7.8$  Hz, 1H), 7.26 (dd,  $J = 0.6, 9.0$  Hz, 2H), 7.20 (d,  $J = 1.2$  Hz, 1H), 3.71 (t,  $J = 4.8$  Hz, 4H), 3.58 (t,  $J = 6.6$  Hz, 2H), 2.64 (t,  $J = 6.6$  Hz, 2H), 2.56 (s, br, 4H). MS (ESI)  $m/z$  488 ( $\text{M}+\text{H}$ ) $^+$ .

**N-methyl-3-(6-(4-(trifluoromethoxy)phenylamino)pyrimidin-4-yl)benzamide**

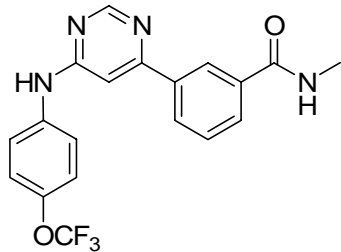

$^1\text{H}$  NMR (600 MHz,  $\text{CD}_3\text{OD}$ )  $\delta$  8.83 (s, 1H), 8.33 (t,  $J = 1.8$  Hz, 1H), 8.07-8.05 (m, 1H), 8.03-8.01 (m, 1H), 7.80 (d,  $J = 8.4$  Hz, 2H), 7.72 (t,  $J = 7.8$  Hz, 1H), 7.36 (d,  $J = 8.4$  Hz, 2H), 7.26 (s, 1H), 2.96 (s, 3H). MS (ESI)  $m/z$  389 ( $\text{M}+\text{H}$ ) $^+$ .

**Morpholino(3-(6-(4-(trifluoromethoxy)phenylamino)pyrimidin-4-yl)phenyl)methanone**



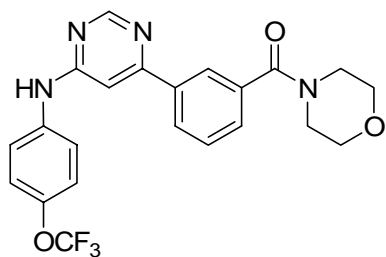

**5k**, TFA salt

$^1\text{H}$  NMR (600 MHz,  $\text{CD}_3\text{OD}$ )  $\delta$  8.85 (s, 1H), 7.98-7.97 (m, 1H), 7.92 (s, 1H), 7.81 (d,  $J$  = 9.0 Hz, 2H), 7.76-7.71 (m, 2H), 7.36 (d,  $J$  = 8.4 Hz, 2H), 7.25 (s, 1H), 3.78 (brs, 4H), 3.65 (brs, 2H), 3.48 (brs, 2H). MS (ESI)  $m/z$  445 ( $\text{M}+\text{H}$ ) $^+$ .

Compounds **6a-6f** were prepared using similar synthetic procedure to that of **1**, and corresponding substituted pyrazoleboronic acids were used.

**6-(1H-pyrazol-4-yl)-N-(4-(trifluoromethoxy)phenyl)pyrimidin-4-amine**

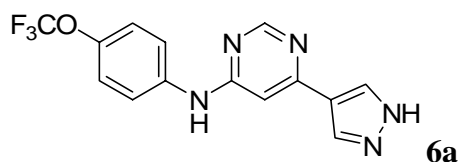

$^1\text{H}$  NMR (400 MHz,  $\text{DMSO}-d_6$ )  $\delta$  10.52 (s, 1H), 8.84 (s, 1H), 8.42 (s, 2H), 7.86 (d,  $J$  = 9.2 Hz, 2H), 7.48 (d,  $J$  = 9.2 Hz, 2H), 7.14 (s, 1H). MS (ESI)  $m/z$  322 ( $\text{M} + \text{H}$ ) $^+$ . HRMS (ESI) calcd for  $\text{C}_{14}\text{H}_{10}\text{F}_3\text{N}_5\text{O}$  321.0837, found 322.0910 ( $\text{M}+\text{H}$ ) $^+$ .

**6-(1-methyl-1H-pyrazol-4-yl)-N-(4-(trifluoromethoxy)phenyl)pyrimidin-4-amine**

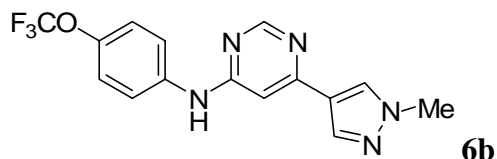

$^1\text{H}$  NMR (400 MHz,  $\text{DMSO}-d_6$ )  $\delta$  9.76 (s, 1H), 8.58 (s, 1H), 8.31 (s, 1H), 7.97 (s, 1H), 7.80 (d,  $J$  = 8.8 Hz, 2H), 7.33 (d,  $J$  = 8.8 Hz, 2H), 6.90 (s, 1H), 3.91 (s, 3H); MS (ESI)  $m/z$  336 ( $\text{M} + \text{H}$ ) $^+$ .

**6-(1-isobutyl-1H-pyrazol-4-yl)-N-(4-(trifluoromethoxy)phenyl)pyrimidin-4-amine**

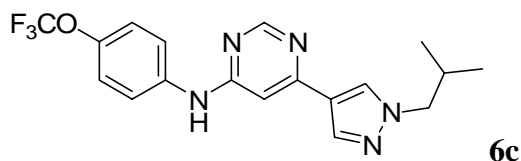

$^1\text{H}$  NMR (400 MHz, DMSO- $d_6$ )  $\delta$  10.29 (s, 1H), 8.71 (s, 1H), 8.44 (s, 1H), 8.09 (s, 1H), 7.77 (d,  $J = 8.8$  Hz, 2H), 7.38 (d,  $J = 8.8$  Hz, 2H), 7.00 (brs, 1H), 4.01 (d,  $J = 7.2$  Hz, 2H), 2.19-2.12 (m, 1H), 0.87 (d,  $J = 4.0$  Hz, 6H). MS (ESI)  $m/z$  378 (M + H) $^+$ .

**6-(5-methyl-1-phenyl-1H-pyrazol-4-yl)-N-(4-(trifluoromethoxy)phenyl)pyrimidin-4-amine**

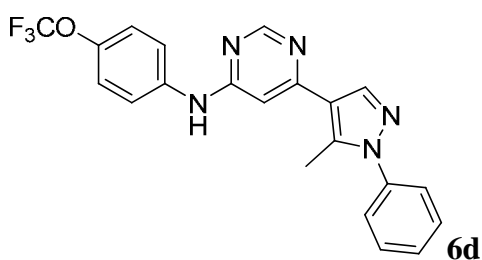

$^1\text{H}$  NMR (400 MHz, DMSO- $d_6$ )  $\delta$  10.23 (s, 1H), 8.77 (s, 1H), 8.19 (s, 1H), 7.83 (d,  $J = 8.8$  Hz, 2H), 7.64-7.63 (m, 3H), 7.55-7.51 (m, 2H), 7.38 (d,  $J = 8.8$  Hz, 2H), 7.05 (s, 1H), 2.69 (s, 3H). MS (ESI)  $m/z$  412 (M + H) $^+$ .

**N-(4-(trifluoromethoxy)phenyl)-6-(1,3,5-trimethyl-1H-pyrazol-4-yl)pyrimidin-4-amine**

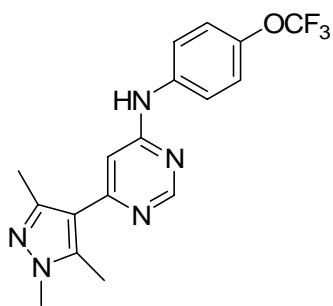

$^1\text{H}$  NMR (400 MHz, DMSO- $d_6$ )  $\delta$  9.74 (s, 1H), 8.65 (s, 1H), 7.82 (d,  $J = 9.2$  Hz, 2H), 7.33 (d,  $J = 9.2$  Hz, 2H), 6.82 (s, 1H), 3.72 (s, 3H), 2.48 (s, 3H), 2.33 (s, 3H); MS (ESI)  $m/z$  364 (M + H) $^+$ .

**6-(1-(pyridin-3-ylmethyl)-1H-pyrazol-4-yl)-N-(4-(trifluoromethoxy)phenyl)pyrimidin-4-amine**

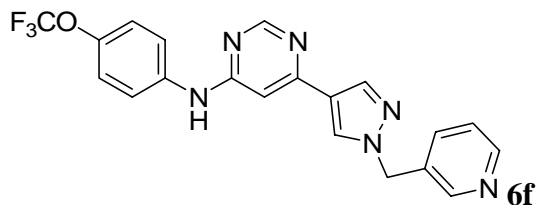

$^1\text{H}$  NMR (400 MHz, DMSO- $d_6$ ) 9.97 (s, 1H), 8.58 (s, 1H), 8.55 (s, 1H), 8.50 (s, 1H), 8.02 (brs, 1H), 7.71 (d,  $J = 8.8$  Hz, 2H), 7.40-7.43 (m, 1H), 7.27 (d,  $J = 8.8$  Hz, 2H), 7.17 (s, 1H), 7.04 (s, 1H), 6.91 (m, 1H), 5.43 (s, 2H); MS (ESI)  $m/z$  413 (M + H) $^+$ .

Compounds **7a-7d** were prepared using similar synthetic procedure to that of **1**, and corresponding substituted heteroaromatic boronic acids were used.

**6-(1H-indol-4-yl)-N-(4-(trifluoromethoxy)phenyl)pyrimidin-4-amine**

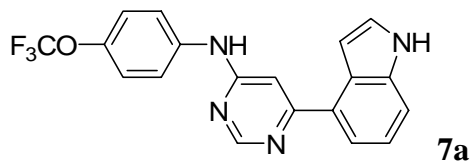

$^1\text{H}$  NMR (400 MHz, DMSO- $d_6$ )  $\delta$  11.52 (s, 1H), 8.86 (s, 1H), 7.86 (d,  $J = 8.8$  Hz, 2H), 7.63-7.58 (m, 2H), 7.42-7.39 (m, 3H), 7.27 (t,  $J = 3.2$  Hz, 1H), 6.93 (brs, 1H); MS (ESI)  $m/z$  371 (M + H) $^+$ .

**6-(1H-indol-5-yl)-N-(4-(trifluoromethoxy)phenyl)pyrimidin-4-amine**

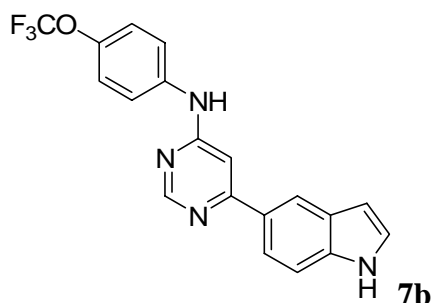

$^1\text{H}$  NMR (400 MHz, DMSO- $d_6$ )  $\delta$  11.42 (s, 1H), 8.77 (s, 1H), 8.29 (s, 1H), 7.85 (d,  $J = 8.8$  Hz, 1H), 7.76 (d,  $J = 8.8$  Hz, 2H), 7.55 (d,  $J = 8.8$  Hz, 1H), 7.47 (t,  $J = 3.2$  Hz, 1H), 7.39 (d,  $J = 8.6$  Hz, 2H), 7.28 (s, 1H), 6.60 (brs, 1H); MS (ESI)  $m/z$  371 (M + H) $^+$ .

**6-(1H-pyrrolo[2,3-b]pyridin-4-yl)-N-(4-(trifluoromethoxy)phenyl)pyrimidin-4-amine**

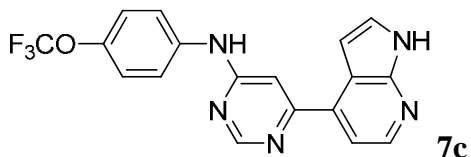

$^1\text{H}$  NMR (400 MHz, DMSO- $d_6$ )  $\delta$  12.05 (s, 1H), 10.21 (s, 1H), 8.88 (s, 1H), 8.40 (d,  $J = 4.8$  Hz, 1H), 7.88 (d,  $J = 8.4$  Hz, 2H), 7.72 (t,  $J = 3.2$  Hz, 1H), 7.65 (d,  $J = 5.2$  Hz, 1H), 7.52 (s, 1H), 7.40 (d,  $J = 8.4$  Hz, 2H), 6.97 (dd,  $J = 2, 3.6$  Hz, 1H); MS (ESI)  $m/z$  372 (M + H) $^+$ .

**6-(2-methylthiazol-4-yl)-N-(4-(trifluoromethoxy)phenyl)pyrimidin-4-amine**

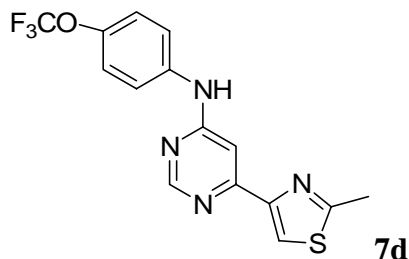

$^1\text{H}$  NMR (400 MHz, DMSO- $d_6$ )  $\delta$  9.96 (s, 1H), 8.67 (s, 1H), 8.24 (s, 1H), 7.84 (d,  $J = 9.2$  Hz, 2H), 7.50 (d,  $J = 0.8$  Hz, 1H), 7.35 (d,  $J = 9.2$  Hz, 2H), 2.74 (s, 3H); MS (ESI)  $m/z$  353 (M + H) $^+$ .

**Table 2.**

Compounds **8a-8g** were prepared using the similar synthetic procedure to that of **4b**.

***N*<sup>4</sup>-methyl-*N*<sup>6</sup>-(2-morpholinoethyl)-*N*<sup>4</sup>-(4-(trifluoromethoxy)phenyl)pyrimidine-4,6-diamine**

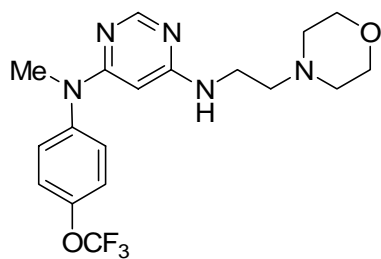

$^1\text{H}$  NMR (600 MHz, CD $_3$ OD)  $\delta$  8.22 (s, 1H), 7.49-7.45 (m, 4H), 5.68 (s, 1H), 3.92 (brs, 4H), 3.85 (t,  $J = 5.4$  Hz, 2H), 3.47 (s, 3H), 3.41 (t,  $J = 6.0$  Hz, 2H), 3.40-3.32 (m, 4H);

MS (ESI)  $m/z$  398 (M+H)<sup>+</sup>, HRMS (ESI) calcd for C<sub>18</sub>H<sub>22</sub>F<sub>3</sub>N<sub>5</sub>O<sub>2</sub> 397.1726, found 398.1791 (M+H)<sup>+</sup>.

***N*<sup>4</sup>-(4-methoxyphenyl)-*N*<sup>6</sup>-(2-morpholinoethyl)pyrimidine-4,6-diamine**

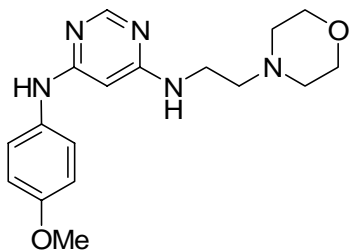

<sup>1</sup>H NMR (400 MHz, DMSO-*d*<sub>6</sub>) δ 9.83 (s, 1H), 8.33 (s, 1H), 8.08 (s, 1H), 7.28 (d, *J* = 8.4 Hz, 2H), 6.97 (d, *J* = 8.4 Hz, 2H), 5.74 (s, 1H), 3.78-3.86 (m, 4H), 3.76 (s, 3H), 3.65 (d, *J* = 5.6 Hz, 2H), 3.24-3.34 (m, 6H); MS (ESI)  $m/z$  330 M+H)<sup>+</sup>.

***N*<sup>4</sup>-(2-morpholinoethyl)-*N*<sup>6</sup>-(3-(trifluoromethoxy)phenyl)pyrimidine-4,6-diamine**

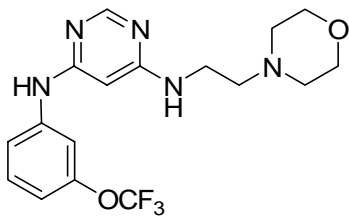

<sup>1</sup>H NMR (400 MHz, DMSO-*d*<sub>6</sub>) δ 9.69 (s, 1H), 8.32 (s, 1H), 7.75 (s, 1H), 7.67 (s, 1H), 7.47 (d, *J* = 9.2 Hz, 1H), 7.41 (t, *J* = 8.0 Hz, 1H), 6.95 (d, *J* = 8.0 Hz, 1H), 5.93 (s, 1H), 3.80-3.88 (m, 4H), 3.65 (d, *J* = 5.6 Hz, 2H), 3.26-3.36 (m, 6H); MS (ESI)  $m/z$  384 (M+H)<sup>+</sup>.

***N*-(2-morpholinoethyl)-6-(4-(trifluoromethoxy)phenoxy)pyrimidin-4-amine**

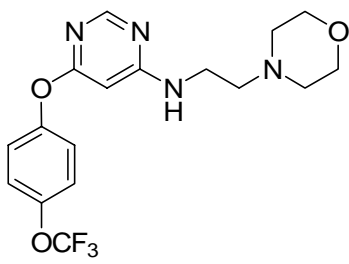

$^1\text{H}$  NMR (400 MHz,  $\text{DMSO-}d_6$ )  $\delta$  8.22 (s, 1H), 7.67 (s, 1H), 7.44 (d,  $J = 8.8$  Hz, 2H), 7.26 (d,  $J = 8.8$  Hz, 2H), 5.96 (s, 1H), 3.86-3.94 (m, 4H), 3.66 (d,  $J = 5.6$  Hz, 2H), 3.23-3.33 (m, 6H); MS (ESI)  $m/z$  385 ( $\text{M}+\text{H}$ ) $^+$ .

**N-(2-morpholinoethyl)-6-(4-(trifluoromethoxy)phenyl)pyrimidin-4-amine**

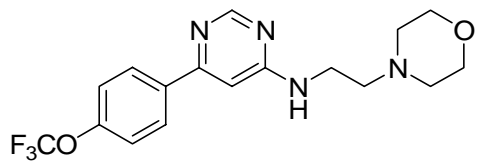

**8e**

$^1\text{H}$  NMR (400 MHz,  $\text{DMSO-}d_6$ )  $\delta$  8.69 (s, 1H), 8.39 (s, 1H), 8.10 (d,  $J = 8.4$  Hz, 2H), 7.55 (d,  $J = 8.4$  Hz, 2H), 7.09 (s, 1H), 3.77-3.85 (m, 4H), 3.62 (d,  $J = 5.6$  Hz, 2H), 3.32-3.42 (m, 6H); MS (ESI)  $m/z$  369 ( $\text{M}+\text{H}$ ) $^+$ .

***N*<sup>4</sup>-(2-morpholinoethyl)-*N*<sup>6</sup>-(4-(trifluoromethyl)phenyl)pyrimidine-4,6-diamine**

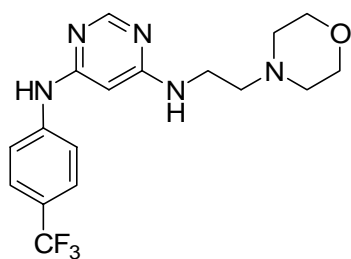

**8f**

$^1\text{H}$  NMR (400 MHz,  $\text{DMSO-}d_6$ )  $\delta$  9.71 (s, 1H), 8.32 (s, 1H), 7.78 (d,  $J = 8.4$  Hz, 2H), 7.63 (d,  $J = 8.4$  Hz, 2H), 7.58 (s, 1H), 5.97 (s, 1H), 3.80-3.88 (m, 4H), 3.65 (d,  $J = 5.6$  Hz, 2H), 3.26-3.36 (m, 6H); MS (ESI)  $m/z$  368 ( $\text{M}+\text{H}$ ) $^+$ .

***N*<sup>4</sup>-(4-(trifluoromethoxy)benzyl)-*N*<sup>6</sup>-(2-morpholinoethyl)pyrimidine-4,6-diamine**

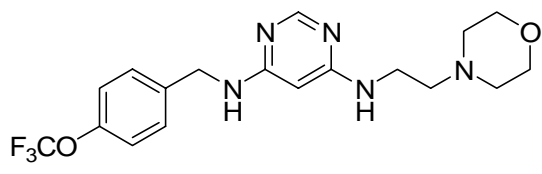

**8g**

$^1\text{H}$  NMR (400 MHz,  $\text{DMSO-}d_6$ )  $\delta$  9.90 (s, 1H), 8.22 (s, 1H), 7.43 (d,  $J = 8.4$  Hz, 2H), 7.35 (d,  $J = 8.4$  Hz, 2H), 6.57 (s, 1H), 4.47-4.51 (m, 2H), 3.76-3.84 (m, 4H), 3.58 (d,  $J = 5.6$  Hz, 2H), 3.40-3.50 (m, 6H); MS (ESI)  $m/z$  398 ( $\text{M}+\text{H}$ ) $^+$ .

**Table 3.**

Compounds **9a-9f** were prepared using the similar synthetic procedure to that of **4b**.

**5-methyl-*N*<sup>4</sup>-(2-morpholinoethyl)-*N*<sup>6</sup>-(4-(trifluoromethoxy)phenyl)pyrimidine-4,6-diamine**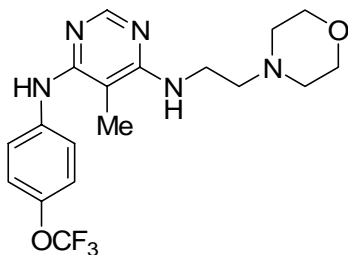**9a**, TFA salt

<sup>1</sup>H NMR (600 MHz, CDCl<sub>3</sub>) δ 8.26 (s, 1H), 7.47-7.45 (m, 2H), 7.17 (d, *J* = 9.0 Hz, 2H), 6.18 (s, 1H), 5.50 (brs, 1H), 3.81 (brs, 4H), 3.68-3.62 (m, 2H), 2.76 (brs, 2H), 2.65 (s, br, 4H), 1.99 (s, 3H); MS (ESI) *m/z* 398 (M+H)<sup>+</sup>.

**2-methyl-*N*<sup>4</sup>-(2-morpholinoethyl)-*N*<sup>6</sup>-(4-(trifluoromethoxy)phenyl)pyrimidine-4,6-diamine**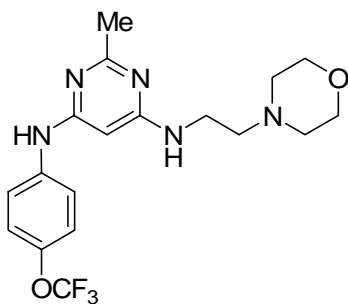**9b**, TFA salt

<sup>1</sup>H NMR (600 MHz, CDCl<sub>3</sub>) δ 7.32-7.29 (m, 2H), 7.20 (d, *J* = 8.4 Hz, 2H), 7.00 (brs, 1H), 5.57 (brs, 1H), 5.52 (s, 1H), 3.73-3.68 (m, 4H), 3.24 (brs, 2H), 2.58 (t, *J* = 6.0 Hz, 2H), 2.46 (brs, 4H), 2.41 (s, 3H); MS (ESI) *m/z* 398 (M+H)<sup>+</sup>.

***N*<sup>4</sup>-(2-morpholinoethyl)-*N*<sup>2</sup>-(4-(trifluoromethoxy)phenyl)pyrimidine-2,4-diamine**

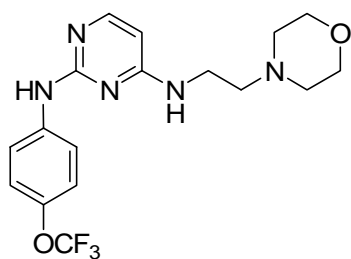

**9c**

$^1\text{H}$  NMR (400 MHz, DMSO- $d_6$ )  $\delta$  10.46 (s, 1H), 8.77 (s, 1H), 7.91 (d,  $J = 7.2$  Hz, 1H), 7.72 (d,  $J = 8.4$  Hz, 2H), 7.38 (d,  $J = 8.4$  Hz, 2H), 6.22 (d,  $J = 6.0$  Hz, 1H), 3.68-3.76 (m, 4H), 3.63 (d,  $J = 6.0$  Hz, 2H), 3.26-3.36 (m, 6H); MS (ESI)  $m/z$  384 (M+H) $^+$ .

**$N^2$ -(2-morpholinoethyl)- $N^4$ -(4-(trifluoromethoxy)phenyl)pyrimidine-2,4-diamine**

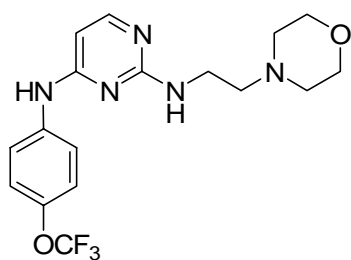

**9d**

$^1\text{H}$  NMR (400 MHz, DMSO- $d_6$ )  $\delta$  10.98 (s, 1H), 8.85 (s, 1H), 7.99 (d,  $J = 7.2$  Hz, 1H), 7.77 (d,  $J = 8.4$  Hz, 2H), 7.43 (d,  $J = 8.4$  Hz, 2H), 6.37 (d,  $J = 7.2$  Hz, 1H), 3.71-3.78 (m, 4H), 3.60 (d,  $J = 6.0$  Hz, 2H), 3.29-3.39 (m, 6H); MS (ESI)  $m/z$  384 (M+H) $^+$ .

**$N^2$ -(2-morpholinoethyl)- $N^6$ -(4-(trifluoromethoxy)phenyl)pyrazine-2,6-diamine**

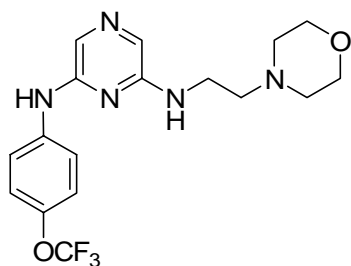

**9e, TFA salt**

$^1\text{H}$  NMR (600 MHz, CD $_3$ OD)  $\delta$  7.66-7.63 (m, 2H), 7.34 (s, 1H), 7.30 (s, 1H), 7.28 (d,  $J = 8.4$  Hz, 2H), 3.92 (brs, 2H), 3.86 (t,  $J = 6.0$  Hz, 2H), 3.75 (brs, 2H), 3.53 (brs, 2H), 3.41 (t,  $J = 6.0$  Hz, 2H), 3.12 (brs, 2H); MS (ESI)  $m/z$  384 (M+H) $^+$ .



***N*<sup>3</sup>-(2-morpholinoethyl)-*N*<sup>6</sup>-(4-(trifluoromethoxy)phenyl)pyridazine-3,6-diamine**

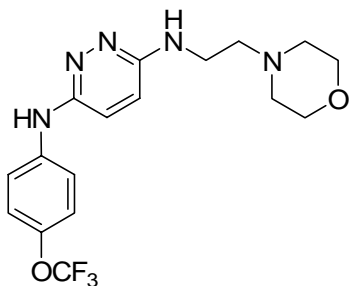

**9f**, TFA salt

<sup>1</sup>H NMR (600 MHz, CD<sub>3</sub>OD) δ 7.65-7.63 (m, 2H), 7.48 (d, *J* = 9.6 Hz, 1H), 7.42 (d, *J* = 10.2 Hz, 1H), 7.30 (d, *J* = 8.4 Hz, 2H), 3.94 (brs, 4H), 3.84 (t, *J* = 6.0 Hz, 2H), 3.50 (t, *J* = 6.0 Hz, 2H), 3.40 (brs, 4H); MS (ESI) *m/z* 384 (M+H)<sup>+</sup>.

Compounds **9g-9k** were prepared using similar synthetic procedure to that of **1**.

***N*-methyl-6-(pyridin-4-yl)-*N*-(4-(trifluoromethoxy)phenyl)pyrimidin-4-amine**

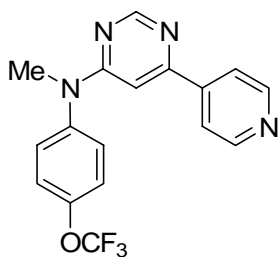

**9g**, TFA salt

<sup>1</sup>H NMR (600 MHz, CD<sub>3</sub>OD) δ 8.85 (d, *J* = 4.8 Hz, 2H), 8.79 (s, 1H), 8.33 (d, *J* = 6.6 Hz, 2H), 7.52 (d, *J* = 9.0 Hz, 2H), 7.46 (d, *J* = 9.0 Hz, 2H), 7.12 (s, 1H), 3.61 (s, 3H); MS (ESI) *m/z* 347 (M+H)<sup>+</sup>, HRMS (ESI) calcd for C<sub>17</sub>H<sub>13</sub>F<sub>3</sub>N<sub>4</sub>O, found 347.1113 (M+H)<sup>+</sup>.

***N*-(4-fluorophenyl)-6-(pyridin-4-yl)pyrimidin-4-amine**

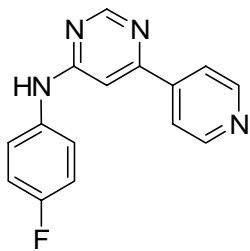

**9h**

$^1\text{H}$  NMR (400 MHz,  $\text{DMSO-}d_6$ )  $\delta$  10.00 (s, 1H), 8.85 (d,  $J = 6.4$  Hz, 2H), 8.78 (s, 1H), 8.14 (d,  $J = 6.4$  Hz, 2H), 7.70-7.76 (m, 2H), 7.36 (s, 1H), 7.22 (t,  $J = 8.8$  Hz, 2H); MS (ESI)  $m/z$  267 ( $\text{M}+\text{H}$ ) $^+$ .

**N-(4-methoxyphenyl)-6-(pyridin-4-yl)pyrimidin-4-amine**

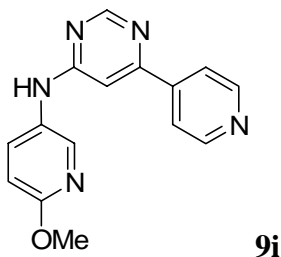

$^1\text{H}$  NMR (400 MHz,  $\text{DMSO-}d_6$ )  $\delta$  9.93 (s, 1H), 8.86 (d,  $J = 6.4$  Hz, 2H), 8.75 (s, 1H), 8.41 (d,  $J = 2.4$  Hz, 1H), 8.16 (d,  $J = 6.4$  Hz, 2H), 8.02 (d,  $J = 8.8$  Hz, 1H), 7.33 (s, 1H), 6.67 (d,  $J = 8.8$  Hz, 1H), 3.85 (s, 3H); MS (ESI)  $m/z$  280 ( $\text{M}+\text{H}$ ) $^+$ .

**6-(pyridin-4-yl)-N-(4-(trifluoromethyl)phenyl)pyrimidin-4-amine**

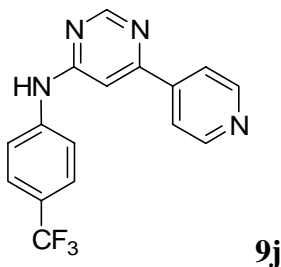

$^1\text{H}$  NMR (400 MHz,  $\text{DMSO-}d_6$ )  $\delta$  10.33 (s, 1H), 8.89 (s, 1H), 8.85 (d,  $J = 6.4$  Hz, 2H), 8.12 (d,  $J = 6.4$  Hz, 2H), 7.99 (d,  $J = 8.8$  Hz, 2H), 7.73 (d,  $J = 8.8$  Hz, 2H), 7.48 (s, 1H); MS (ESI)  $m/z$  317 ( $\text{M}+\text{H}$ ) $^+$ .

**6-(pyridin-4-yl)-N-(6-(trifluoromethyl)pyridin-3-yl)pyrimidin-4-amine**

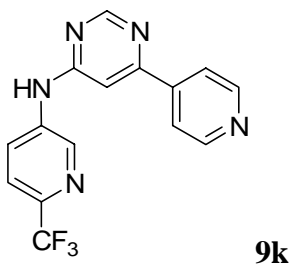

$^1\text{H}$  NMR (400 MHz,  $\text{DMSO-}d_6$ )  $\delta$  10.56 (s, 1H), 9.00 (d,  $J = 2.8$  Hz, 1H), 8.93 (s, 1H), 8.87 (d,  $J = 4.8$  Hz, 2H), 8.58 (d,  $J = 8.8$  Hz, 1H), 8.15 (d,  $J = 4.8$  Hz, 2H), 7.91 (d,  $J = 8.8$  Hz, 1H), 7.52 (s, 1H); MS (ESI)  $m/z$  318 ( $\text{M}+\text{H}$ ) $^+$ .

### Synthesis of $N^2$ -(2-morpholinoethyl)- $N^4$ -(4-(trifluoromethoxy)phenyl)-1,3,5-triazine-2,4-diamine

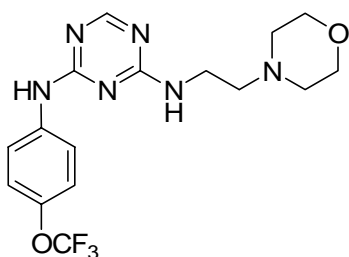

**91**, TFA salt

To a stirred solution of 2,4-dichloro-1,3,5-triazine (30 mg, 0.2 mmol) in 1.0 mL of 2-PrOH was added 4-(trifluoromethoxy)benzenamine (27  $\mu\text{L}$ , 0.2 mmol) and DIEA (52  $\mu\text{L}$ , 0.3 mmol) at 0  $^\circ\text{C}$ . After 30 min, 2-morpholinoethanamine (45  $\mu\text{L}$ , 0.35 mmol) was added at RT. After the reaction was complete as monitored by LC-MS, the solvent was removed and the title compound was purified by reverse-phase prep-HPLC using a water (0.05% TFA)/acetonitrile (0.05% TFA) gradient to afford the title compound **91** as the TFA salt (78 mg, 78%). **91** and its tautomer,  $^1\text{H}$  NMR (600 MHz,  $\text{CD}_3\text{OD}$ )  $\delta$  8.43 (s, 0.2H), 8.38 (s, 0.8H), 7.74 (d,  $J = 8.4$  Hz, 0.4H), 7.69 (d,  $J = 8.4$  Hz, 1.6H), 7.36 (d,  $J = 8.4$  Hz, 1.6 H), 7.26 (d,  $J = 8.4$  Hz, 0.4H), 4.00-3.65 (m, 7.5 H), 3.60-3.40 (m, 4H), 3.20-3.00 (m, 0.5H); MS (ESI)  $m/z$  385 ( $\text{M}+\text{H}$ ) $^+$ .

### Table 4.

#### (4-(4-(trifluoromethoxy)phenylamino)thieno[2,3-*d*]pyrimidin-6-yl)methanol

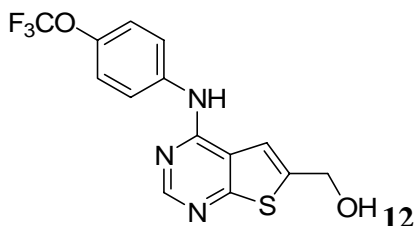

$^1\text{H}$  NMR (400 MHz, DMSO- $d_6$ )  $\delta$  10.29 (s, 1H), 8.45 (s, 1H), 7.91 (d,  $J = 9.6$  Hz, 2H), 7.21 (d,  $J = 9.6$  Hz, 2H), 6.59 (s, 1H), 4.80 (s, 2H); MS (ESI)  $m/z$  342 (M + H) $^+$ .

Compounds **14b-4g** were prepared using synthetic procedure of **14a**, the corresponding amines were used.

**N-ethyl-4-(4-(trifluoromethoxy)phenylamino)thieno[2,3-*d*]pyrimidine-6-carboxamide**

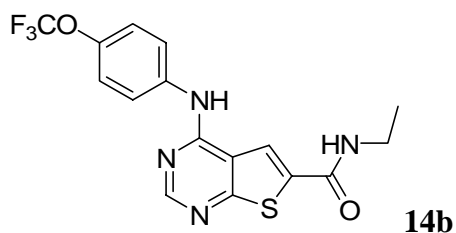

$^1\text{H}$  NMR (400 MHz, DMSO- $d_6$ )  $\delta$  10.39 (s, 1H), 8.55 (s, 1H), 7.94 (d,  $J = 9.6$  Hz, 2H), 7.31 (d,  $J = 9.6$  Hz, 2H), 6.60 (s, 1H), 3.23 (q,  $J = 3.2$  Hz, 2H), 1.78 (t,  $J = 3.3$  Hz, 3H); MS (ESI)  $m/z$  383 (M + H) $^+$ .

**piperazin-1-yl(4-(4-(trifluoromethoxy)phenylamino)thieno[2,3-*d*]pyrimidin-6-yl)methanone**

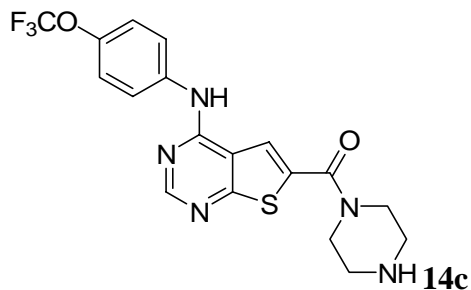

$^1\text{H}$  NMR (600 MHz, CD $_3$ OD)  $\delta$  8.53 (s, 1H), 8.18 (s, 1H), 7.94 (d,  $J = 9.0$  Hz, 2H), 7.30 (d,  $J = 9.0$  Hz, 2H), 4.08 (t,  $J = 5.4$  Hz, 4H), 3.39 (t,  $J = 5.4$  Hz, 4H); MS (ESI)  $m/z$  424 (M + H) $^+$ .

**(4-methylpiperazin-1-yl)(4-(4-(trifluoromethoxy)phenylamino)thieno[2,3-*d*]pyrimidin-6-yl)methanone**

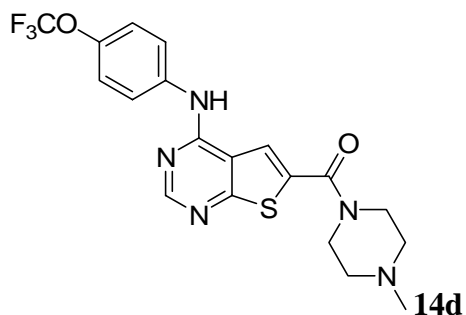

$^1\text{H}$  NMR (600MHz,  $\text{CD}_3\text{OD}$ )  $\delta$  8.65 (s, 1H), 8.13 (s, 1H), 8.01 (d,  $J = 8.4$  Hz, 2H), 7.41 (d,  $J = 9.0$  Hz, 2H), 4.01 (brs, 4H), 2.83 (brs, 4H), 2.59 (s, 3H); MS (ESI)  $m/z$  438 ( $\text{M} + \text{H}$ ) $^+$ .

**(4-(pyrrolidin-1-yl)piperazin-1-yl)(4-(4-(trifluoromethoxy)phenylamino)thieno[2,3-*d*]pyrimidin-6-yl)methanone**

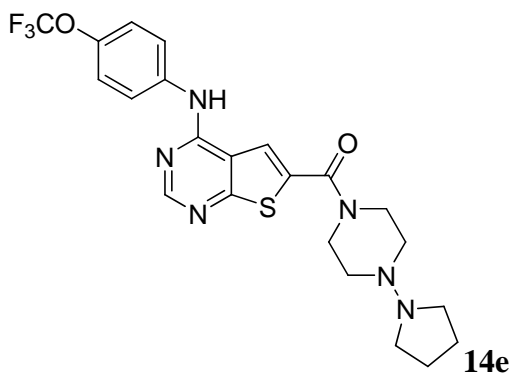

$^1\text{H}$  NMR (400 MHz,  $\text{DMSO-}d_6$ )  $\delta$  10.05 (s, 1H), 8.59 (s, 1H), 8.12 (s, 1H), 7.94 (d,  $J = 9.2$  Hz, 2H), 7.42 (d,  $J = 9.2$  Hz, 2H), 4.47-4.45 (m, 4H), 3.55-3.54 (m, 4H), 3.15-3.11 (m, 4H), 2.19-2.00 (m, 2H), 1.88-1.85 (m, 2H); MS (ESI)  $m/z$  493 ( $\text{M} + \text{H}$ ) $^+$ .

**(4-hydroxypiperidin-1-yl)(4-(4-(trifluoromethoxy)phenylamino)thieno[2,3-*d*]pyrimidin-6-yl)methanone**

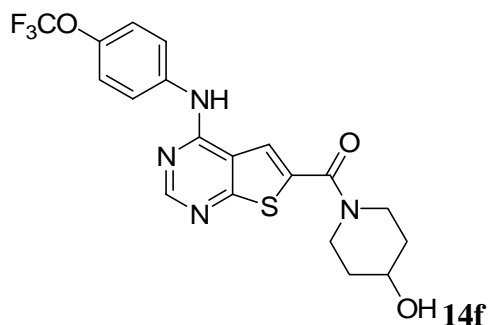

$^1\text{H}$  NMR (400 MHz,  $\text{DMSO-}d_6$ )  $\delta$  10.76 (s, 1H), 9.32 (s, 1H), 8.86 (s, 1H), 7.94 (d,  $J = 8.8$  Hz, 2H), 7.48 (d,  $J = 8.8$  Hz, 2H), 4.69 (brs, 1H), 3.69-3.64 (m, 2H), 3.45-3.43 (m, 2H), 3.21-3.15 (m, 2H), 2.86-2.84 (m, 2H); MS (ESI)  $m/z$  439 ( $\text{M} + \text{H}$ ) $^+$ .

**N-(2-methyl-5-(3-(trifluoromethyl)benzamido)phenyl)-4-(4-(trifluoromethoxy)-phenylamino)-thieno[2,3-*d*]pyrimidine-6-carboxamide**

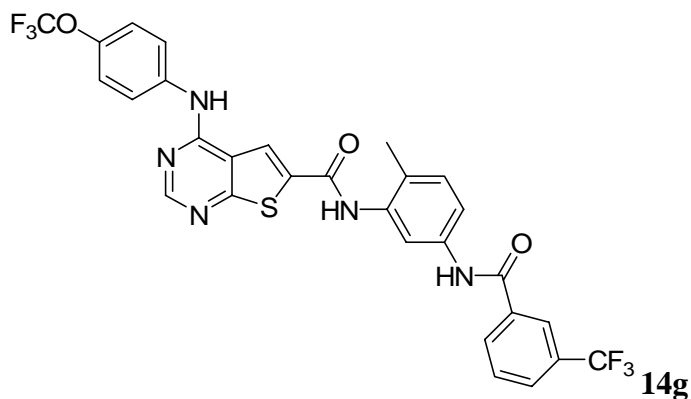

$^1\text{H}$  NMR (400 MHz,  $\text{DMSO-}d_6$ )  $\delta$  10.55 (s, 1H), 10.35 (s, 1H), 10.15 (s, 1H) 8.61 (d,  $J = 4.4$  Hz, 2H), 8.18 (s, 1H), 8.13 (d,  $J = 9.2$  Hz, 1H), 7.99 (d,  $J = 8.8$  Hz, 2H), 7.89 (d,  $J = 2.4$  Hz, 1H), 7.61 (dd,  $J = 8.4, 2.0$  Hz, 1H) 7.43 (d,  $J = 8.8$  Hz, 2H), 7.31 (d,  $J = 8.8$  Hz, 1H), 2.50 (s, 3H); MS (ESI)  $m/z$  632 ( $\text{M} + \text{H}$ ) $^+$ .

**Table 5.**

**7-methyl-N-(4-(trifluoromethoxy)phenyl)-7H-pyrrolo-[2,3-*d*]pyrimidin-4-amine**

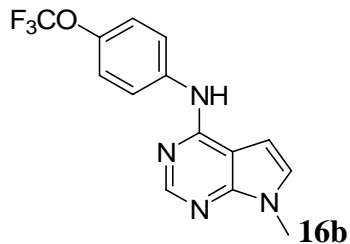

$^1\text{H}$  NMR (400 MHz,  $\text{DMSO-}d_6$ )  $\delta$  12.08 (s, 1H), 8.33 (s, 1H), 7.95 (d,  $J = 9.2$  Hz, 2H), 7.39 (d,  $J = 9.2$  Hz, 2H), 7.34 (d,  $J = 6.2$  Hz, 1H), 6.81 (d,  $J = 6.0$  Hz, 1H), 3.36 (s, 3H); MS  $m/z$  309 ( $\text{M} + \text{H}$ ) $^+$ .

**7-(2-morpholinoethyl)-N-(4-(trifluoromethoxy)phenyl)-7H-pyrrolo[2,3-*d*]pyrimidin-4-amine**

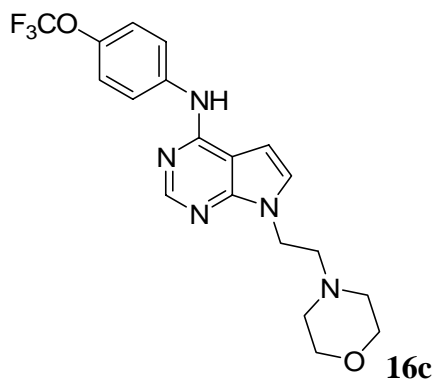

$^1\text{H}$  NMR (400 MHz,  $\text{DMSO-}d_6$ )  $\delta$  9.06 (s, 1H), 8.80 (brs, 1H), 8.65 (d,  $J = 8.8$  Hz, 2H), 7.82 (d,  $J = 8.8$  Hz, 2H), 7.46 (d,  $J = 6.2$  Hz, 1H), 7.17 (d,  $J = 6.0$  Hz, 1H), 5.41-5.39 (m, 2H), 4.43-4.36 (m, 6H), 2.52-2.31 (m, 4H); MS  $m/z$  408 ( $\text{M} + \text{H}$ ) $^+$ .

**7-(4-methoxybenzyl)-N-(4-(trifluoromethoxy)phenyl)-7H-pyrrolo[2,3-*d*]pyrimidin-4-amine**

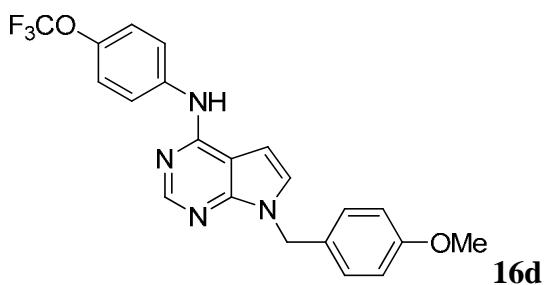

$^1\text{H}$  NMR (400 MHz,  $\text{DMSO-}d_6$ )  $\delta$  9.66 (brs, 1H), 8.36 (s, 1H), 7.98 (d,  $J = 8.6$  Hz, 2 H), 7.41 (d,  $J = 6.2$  Hz, 1H), 7.36 (d,  $J = 8.8$  Hz, 2H), 7.23 (d,  $J = 8.8$  Hz, 2H), 6.88 (d,  $J = 8.8$  Hz, 2H), 6.84 (d,  $J = 3.6$  Hz, 1H), 5.33 (s, 2H), 3.78 (s, 3H); MS (ESI)  $m/z$  415 ( $\text{M} + \text{H}$ ) $^+$ .

**3-(4-(4-(trifluoromethoxy)phenylamino)-7H-pyrrolo[2,3-*d*]pyrimidin-7-yl)-propanamide**

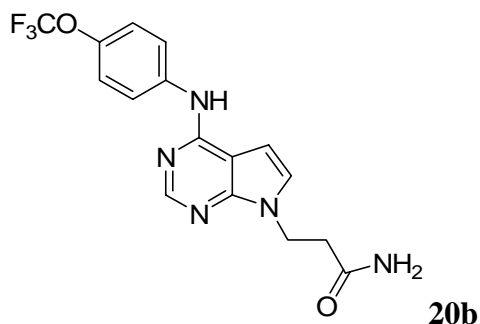

$^1\text{H}$  NMR (400 MHz,  $\text{DMSO-}d_6$ )  $\delta$  8.94 (s, 1H), 8.22 (brs, 1H), 7.94 (d,  $J = 8.8$  Hz, 2H), 7.81 (d,  $J = 8.8$  Hz, 2H), 7.46 (d,  $J = 6.2$  Hz, 1H), 7.18 (d,  $J = 6.0$  Hz, 1H), 5.02 (t,  $J = 6.8$  Hz, 2H), 3.25 (t,  $J = 6.8$  Hz, 2H); MS (ESI)  $m/z$  366 ( $\text{M} + \text{H}$ ) $^+$ .

**Table 6.**

**1-ethyl-N-(4-(trifluoromethoxy)phenyl)-1H-pyrazolo[3,4-*d*]pyrimidin-4-amine**

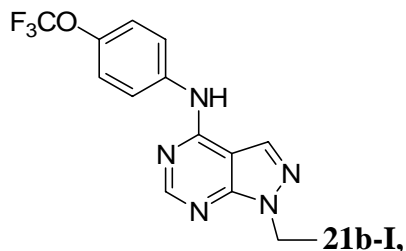

$^1\text{H}$  NMR (400 MHz,  $\text{DMSO-}d_6$ )  $\delta$  10.28 (s, 1H), 8.45 (s, 1H), 8.34 (s, 1H), 8.00 (d,  $J = 8.8$  Hz, 2H), 7.40 (d,  $J = 8.8$  Hz, 2H), 4.38 (q,  $J = 7.2$  Hz, 2H), 1.40 (t,  $J = 7.2$  Hz, 3H); MS (ESI)  $m/z$  324 ( $\text{M} + \text{H}$ ) $^+$ .

**2-ethyl-N-(4-(trifluoromethoxy)phenyl)-2H-pyrazolo[3,4-*d*]pyrimidin-4-amine**

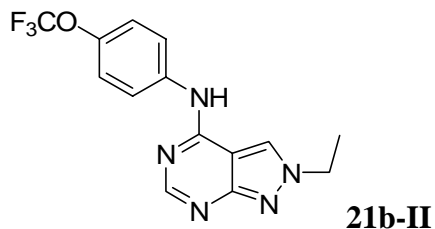

$^1\text{H}$  NMR (400 MHz,  $\text{DMSO-}d_6$ )  $\delta$  10.72 (s, 1H), 8.64 (s, 1H), 8.56 (s, 1H), 7.94 (d,  $J = 8.8$  Hz, 2H), 7.35 (d,  $J = 8.8$  Hz, 2H), 4.40 (q,  $J = 7.2$  Hz, 2H), 1.44 (t,  $J = 7.2$  Hz, 3H); MS (ESI)  $m/z$  324 ( $\text{M} + \text{H}$ ) $^+$ .



**1-propyl-N-(4-(trifluoromethoxy)phenyl)-1H-pyrazolo[3,4-*d*]pyrimidin-4-amine**

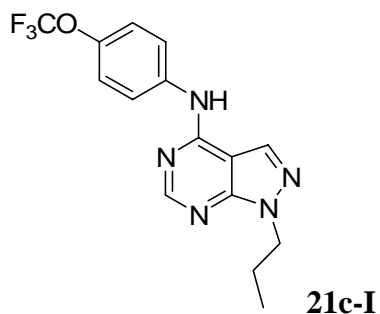

$^1\text{H}$  NMR (400 MHz, DMSO- $d_6$ )  $\delta$  10.24 (s, 1H), 8.45 (s, 1H), 8.33 (s, 1H), 7.99 (d,  $J$  = 8.8 Hz, 2H), 7.40 (d,  $J$  = 8.8 Hz, 2H), 4.32 (t,  $J$  = 7.2 Hz, 2H), 1.86 (m, 2H), 0.83 (t,  $J$  = 7.6 Hz, 3H); MS (ESI)  $m/z$  338 (M + H) $^+$ .

**2-propyl-N-(4-(trifluoromethoxy)phenyl)-2H-pyrazolo[3,4-*d*]pyrimidin-4-amine**

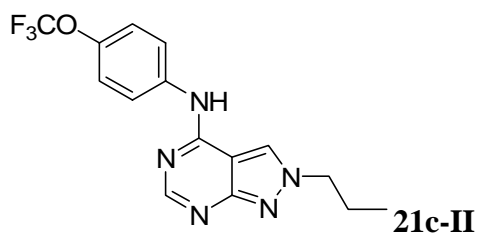

$^1\text{H}$  NMR (400 MHz, DMSO- $d_6$ )  $\delta$  10.20 (s, 1H), 8.49 (s, 1H), 8.36 (s, 1H), 7.93 (d,  $J$  = 8.8 Hz, 2H), 7.33 (d,  $J$  = 8.8 Hz, 2H), 4.35 (t,  $J$  = 7.2 Hz, 2H), 1.85 (m, 2H), 0.80 (t,  $J$  = 7.6 Hz, 3H); MS (ESI)  $m/z$  338 (M + H) $^+$ .

**1-cyclohexyl-N-(4-(trifluoromethoxy)phenyl)-1H-pyrazolo[3,4-*d*]pyrimidin-4-amine**

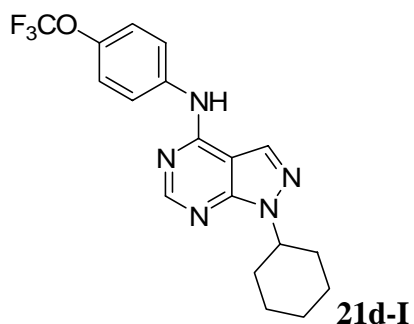

$^1\text{H}$  NMR (400 MHz, DMSO- $d_6$ )  $\delta$  10.16 (s, 1H), 8.36 (s, 1H), 8.25 (s, 1H), 7.91 (d,  $J$  = 8.8 Hz, 2H), 7.32 (d,  $J$  = 8.8 Hz, 2H), 4.63-4.56 (m, 1H), 1.88-1.77 (m, 8H), 1.42-1.37

(m, 2H); MS (ESI)  $m/z$  378 (M + H)<sup>+</sup>, HRMS (ESI) calcd for C<sub>18</sub>H<sub>18</sub>F<sub>3</sub>N<sub>5</sub>O 377.1463, found 378.1534 (M+H)<sup>+</sup>.

**2-cyclohexyl-N-(4-(trifluoromethoxy)phenyl)-2H-pyrazolo[3,4-*d*]pyrimidin-4-amine**

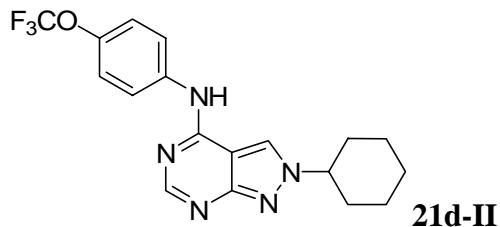

<sup>1</sup>H NMR (400 MHz, DMSO-*d*<sub>6</sub>) δ 10.18 (s, 1H), 8.86 (s, 1H), 8.42 (s, 1H), 8.02 (d, *J* = 8.8 Hz, 2H), 7.40 (d, *J* = 8.8 Hz, 2H), 4.51-4.45 (m, 1H), 1.88-1.72 (m, 8H), 1.40-1.32 (m, 2H); MS (ESI)  $m/z$  378 (M + H)<sup>+</sup>.

**2-(4-(4-(trifluoromethoxy)phenylamino)-1H-pyrazolo[3,4-*d*]pyrimidin-1-yl)-acetamide**

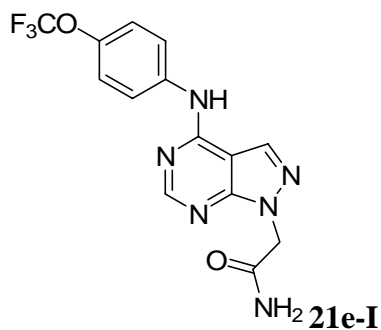

<sup>1</sup>H NMR (400 MHz, DMSO-*d*<sub>6</sub>) δ 10.27 (s, 1H), 8.44 (s, 1H), 8.32 (s, 1H), 7.99 (d, *J* = 8.8 Hz, 2H), 7.60 (s, 1H), 7.41 (d, *J* = 8.8 Hz, 2H), 7.30 (s, 1H), 4.9 (s, 2H); MS (ESI)  $m/z$  353 (M + H)<sup>+</sup>.

**2-(4-(4-(trifluoromethoxy)phenylamino)-2H-pyrazolo[3,4-*d*]pyrimidin-2-yl)-acetamide**

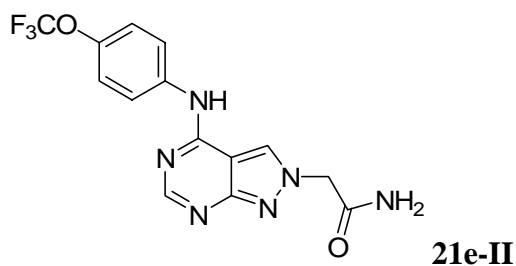

$^1\text{H}$  NMR (400 MHz,  $\text{DMSO-}d_6$ )  $\delta$  10.56 (s, 1H), 8.67 (s, 1H), 8.55 (s, 1H), 7.98 (d,  $J = 8.8$  Hz, 2H), 7.78 (s, 1H), 7.45 (d,  $J = 8.8$  Hz, 2H), 7.30 (s, 1H), 5.17 (s, 2H); MS (ESI)  $m/z$  353 ( $\text{M} + \text{H}$ ) $^+$ .

**1-benzyl-N-(4-(trifluoromethoxy)phenyl)-1H-pyrazolo[3,4-*d*]pyrimidin-4-amine**

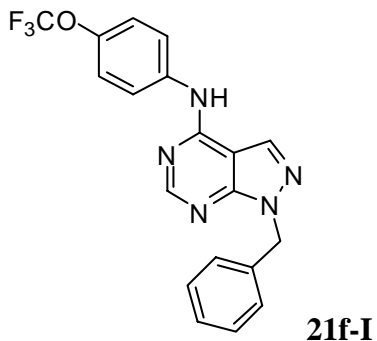

$^1\text{H}$  NMR (400 MHz,  $\text{DMSO-}d_6$ )  $\delta$  10.30 (s, 1H), 8.48 (s, 1H), 8.36 (s, 1H), 7.99 (d,  $J = 8.8$  Hz, 2H), 7.40 (d,  $J = 8.8$  Hz, 2H), 7.30-7.33 (m, 2H), 7.28-7.24 (m, 3H), 5.57 (s, 2H); MS (ESI)  $m/z$  386 ( $\text{M} + \text{H}$ ) $^+$ .

**2-benzyl-N-(4-(trifluoromethoxy)phenyl)-2H-pyrazolo[3,4-*d*]pyrimidin-4-amine**

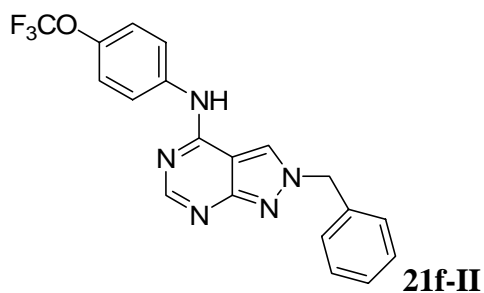

$^1\text{H}$  NMR (400 MHz,  $\text{DMSO-}d_6$ )  $\delta$  10.21 (s, 1H), 8.61 (s, 1H), 8.40 (s, 1H), 8.01 (d,  $J = 8.8$  Hz, 2H), 7.50 (d,  $J = 8.8$  Hz, 2H), 7.37-7.35 (m, 2H), 7.29-7.26 (m, 3H), 5.66 (s, 2H); MS (ESI)  $m/z$  386 ( $\text{M} + \text{H}$ ) $^+$ .

**4-((4-(4-(trifluoromethoxy)phenylamino)-1H-pyrazolo[3,4-*d*]pyrimidin-1-yl)-methyl)benzamide**

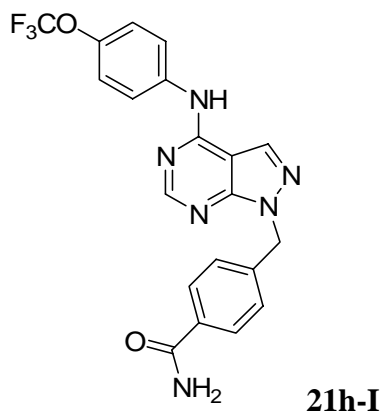

$^1\text{H}$  NMR (600 MHz,  $\text{CD}_3\text{OD}$ )  $\delta$  8.42 (s, 1H), 8.18 (brs, 1H), 7.86 (d,  $J = 9.0$  Hz, 2H), 7.82 (d,  $J = 8.4$  Hz, 2H), 7.37-7.34 (m, 4H), 5.68 (s, 2H); MS (ESI)  $m/z$  429 ( $\text{M} + \text{H}$ ) $^+$ .

**1-((tetrahydrofuran-3-yl)methyl)-N-(4-(trifluoromethoxy)phenyl)-1H-pyrazolo[3,4-*d*]pyrimidin-4-amine**

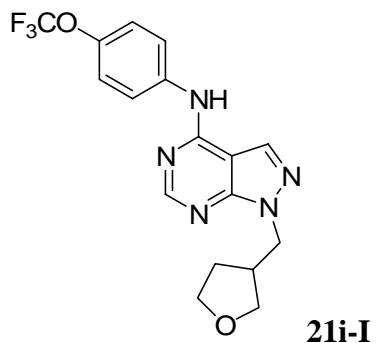

$^1\text{H}$  NMR (400 MHz,  $\text{DMSO-}d_6$ )  $\delta$  10.25 (s, 1H), 8.44 (s, 1H), 8.33 (s, 1H), 7.99 (d,  $J = 9.2$  Hz, 2H), 7.41 (d,  $J = 9.2$  Hz, 2H), 4.58-4.47 (m, 2H), 4.29-4.26 (m, 2H), 3.79-3.76 (m, 2H), 2.09-2.00 (m, 1H), 1.86-1.79 (m, 1H), 1.69-1.61 (m, 1H); MS (ESI)  $m/z$  380 ( $\text{M} + \text{H}$ ) $^+$ .

**1-tert-butyl-N-(4-(trifluoromethoxy)phenyl)-1H-pyrazolo[3,4-*d*]pyrimidin-4-amine**

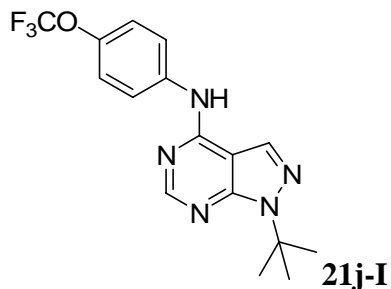

$^1\text{H}$  NMR (400 MHz,  $\text{DMSO-}d_6$ )  $\delta$  10.67 (s, 1H), 8.81 (s, 1H), 8.63 (s, 1H), 7.96 (d,  $J = 9.2$  Hz, 2H), 7.47 (d,  $J = 9.2$  Hz, 2H), 1.68 (s, 9H); MS (ESI)  $m/z$  352 ( $\text{M} + \text{H}$ ) $^+$ .

**1-(pyridin-4-ylmethyl)-N-(4-(trifluoromethoxy)phenyl)-1H-pyrazolo[3,4-*d*]-pyrimidin-4-amine**

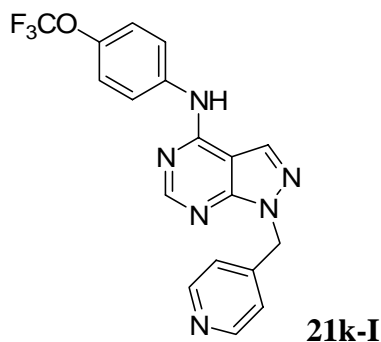

$^1\text{H}$  NMR (600 MHz,  $\text{CD}_3\text{OD}$ )  $\delta$  8.47 (d,  $J = 3.0$  Hz, 2H), 8.43 (s, 1H), 8.24 (brs, 1H), 7.92 (d,  $J = 9.0$  Hz, 2H), 7.30 (d,  $J = 8.4$  Hz, 2H), 7.24 (d,  $J = 6.0$  Hz, 2H), 5.68 (s, 2H); MS (ESI)  $m/z$  387 ( $\text{M} + \text{H}$ ) $^+$ .

**1-((2,4-dimethylthiazol-5-yl)methyl)-N-(4-(trifluoromethoxy)phenyl)-1H-pyrazolo[3,4-*d*]pyrimidin-4-amine**

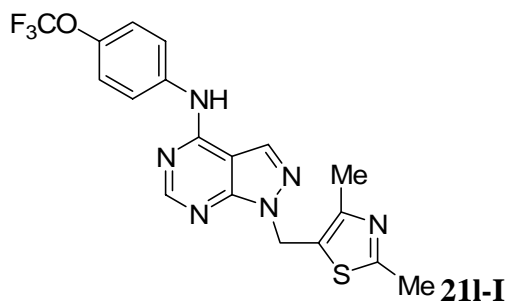

$^1\text{H}$  NMR (600 MHz,  $\text{CD}_3\text{OD}$ )  $\delta$  8.41 (s, 1H), 8.13 (brs, 1H), 7.88 (d,  $J = 9.0$  Hz, 2H), 7.26 (d,  $J = 8.4$  Hz, 2H), 5.62 (s, 2H), 2.52 (s, 3H), 2.47 (s, 3H); MS (ESI)  $m/z$  421 ( $\text{M} + \text{H}$ ) $^+$ .

**N-(4-(trifluoromethoxy)phenyl)-1H-pyrazolo[3,4-*d*]pyrimidin-4-amine**

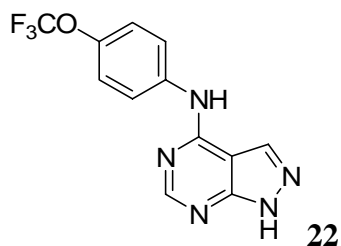

$^1\text{H}$  NMR (400 MHz,  $\text{DMSO-}d_6$ )  $\delta$  9.98 (s, 1H), 8.90 (s, 1H), 8.52 (s, 1H), 7.79 (d,  $J = 9.2$  Hz, 2H), 7.36 (d,  $J = 9.2$  Hz, 2H), 7.16 (s, 1H); MS (ESI)  $m/z$  296 ( $\text{M} + \text{H}$ ) $^+$ .

### 3. HPLC purity determination.

**Instrument and column:** Compound purities were determined using an Agilent 1200 series HPLC system using C8 column (Agilent ZORBAX Eclipse XDB-C8 5  $\mu\text{m}$ , 4.6  $\times$  50 mm).

**Solvent system:** Mobile phase A: Acetonitrile containing 0.1% formic acid; Mobile phase B: Water containing 0.1% formic acid. The flow-rate was 1.0 mL/min and the injection volume was 5  $\mu\text{L}$ . The system was operated at 25  $^\circ\text{C}$ . Peaks were detected at 254 nm and 210 nm.

**Elution condition:**

| Time (min) | Mobile phase A (%) | Mobile phase B (%) |
|------------|--------------------|--------------------|
| 0          | 10                 | 90                 |
| 0.1        | 10                 | 90                 |
| 4.0        | 90                 | 10                 |
| 4.3        | 100                | 0                  |
| 7.6        | 100                | 0                  |
| 8.0        | 10                 | 90                 |

#### 4. Pharmacokinetic Parameters of compounds **5g**, **6a**, **14d**, **21b-I** (Table S1).

Snapshot PK study<sup>2</sup>.

Five to six week old male Balb/c mice (20-25 g) were obtained from Jackson Laboratory (Bar Harbor, Maine, USA). The oral dose was prepared in a 3:1 formulation of PEG300 and D5W and administered at 20 mg/kg via oral gavage (n = 3). Five blood samples (50  $\mu$ L) were serially drawn via retro orbital sinus within 5 hours after dosing. Plasma concentrations of compound were quantified utilizing a Liquid Chromatography/Mass Spectrometry (LC/MS/MS) assay. Pharmacokinetic parameters were calculated by non-compartmental regression analysis using Winnonlin 4.0 software (Pharsight, Mountain View, CA, USA). Pharmacokinetic parameters: AUC = area under the curve (measure of exposure),  $C_{\max}$  = maximum plasma concentration,  $T_{\max}$  = time of maximum plasma concentration.

| Compound ID  | Route | Dose (mg/kg) | $T_{\max}$ (hr) | $C_{\max}$ (ng/mL) | AUC <sub>0-5 hours</sub> (min* $\mu$ g/mL) | Oral exposure |
|--------------|-------|--------------|-----------------|--------------------|--------------------------------------------|---------------|
| <b>5g</b>    | PO    | 20           | 1.0             | 2001               | 563.15                                     | high          |
| <b>6a</b>    | PO    | 20           | 3.0             | 3396               | 366.35                                     | high          |
| <b>14d</b>   | PO    | 20           | 0.5             | 1090               | 144.35                                     | moderate      |
| <b>21b-I</b> | PO    | 20           | 0.5             | 262.75             | 12.05                                      | low           |

Compounds **5g**, **6a** demonstrated high oral exposure with AUC<sub>0-5 hours</sub>/dose value > 10 (min\* $\mu$ g/mL)/(mg/kg); **14d** showed moderate oral exposure with AUC<sub>0-5 hours</sub>/dose value between 2 and 10; while **21b-I** showed low oral exposure with AUC<sub>0-5 hours</sub>/dose value < 2.

#### 5. Calculations of relative transformed energy from trans to cis (Table S2).

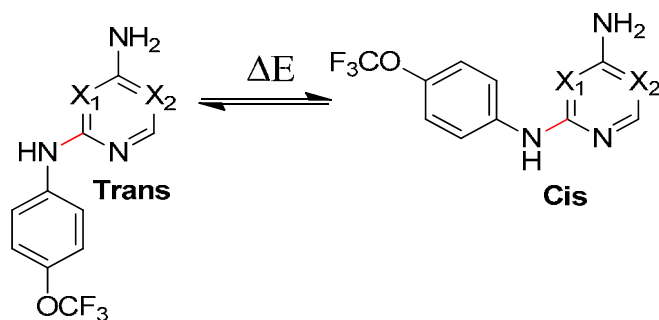

<sup>2</sup> Liu, B.; Chang, J.; Gordon, W. P.; Isbell, J.; Zhou, Y.; Tuntland, T. Snapshot PK: a rapid rodent in vivo preclinical screening approach. *Drug Discovery Today*, **2008**, *13*, 360-367.

**Table S2.** Relative energy from trans to *cis* conformation for the above model molecules.

| Cmpd      | X <sub>1</sub>   | X <sub>2</sub> | $\Delta E_{trans-cis}$<br>(Kcal/mol) | cis        | trans   |
|-----------|------------------|----------------|--------------------------------------|------------|---------|
| <b>4a</b> | CH               | N              | +1.89(+0.22)*                        | disfavored | favored |
| <b>9a</b> | CCH <sub>3</sub> | N              | +11.46(+4.94)*                       | disfavored | favored |
| <b>9c</b> | N                | CH             | +0.11                                | equal      | equal   |
| <b>9l</b> | N                | N              | -0.18                                | equal      | equal   |

\* The numbers in the parenthesis are for energy differences if rotation of the phenyl ring about amine bond is allowed. The twist of **4a** phenyl ring is 26.3 degrees. Compound **9a** twist angle is 37.2 degrees. Compound **9c** and **9l** *cis* conformations have stable planar configuration, therefore do not have corresponding numbers in parenthesis. Compound **9a** planar *cis* conformation is highly unstable, while twist *cis* is stable but higher in energy compared to *trans*. All compounds have planar *trans* conformation.

The calculations were performed by Jaguar quantum mechanical program in Schrodinger software suite<sup>3</sup>. Density functional theory was used with B3LYP functional and pseudospectral 6-31G\*\* basis set. The calculations were done on fine grid with level of accuracy being “accurate”<sup>3</sup>.

## 6. Fluorescence polarization assay results of selected compounds (5g, 7a, 12, 21a-I)

(Table S3).

**Table S3.**

| Select analogs | Kd (μM) | Cellular EC50 (μM) |
|----------------|---------|--------------------|
| <b>5g</b>      | 0.091   | 0.12               |
| <b>7a</b>      | 0.125   | 0.14               |
| <b>12</b>      | 0.200   | 0.33               |
| <b>21a-I</b>   | 0.219   | 0.25               |

<sup>3</sup> <http://www.schrodinger.com>
